# Supplementary material for: Chromosome-Level Comprehensive Genome of Mangrove Sediment-Derived Fungus Penicillium variabile HXQ-H-1
Source: MDPI journal article supplement (doi:10.3390/jof6010007), 2019-12-23
Supplement: s1 [file s1]

a

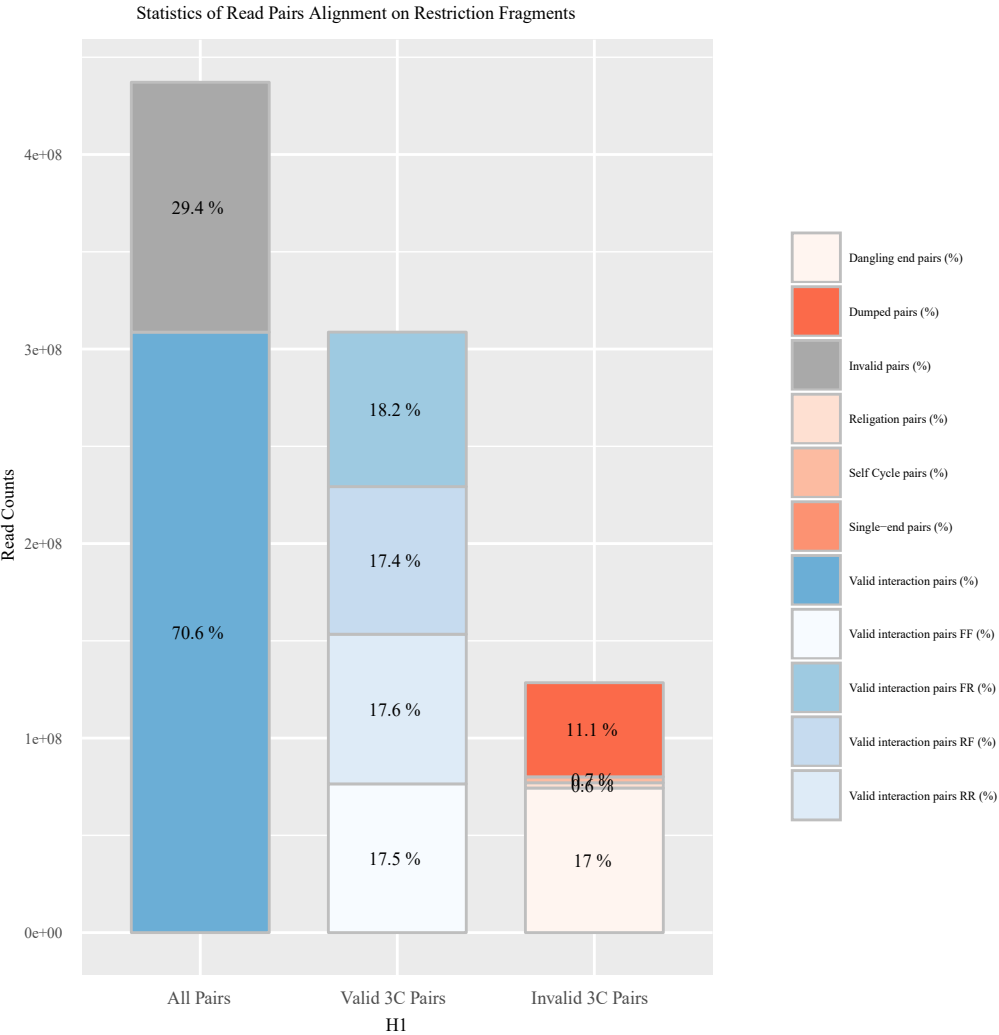

b

| Type                       | Reads number |
|----------------------------|--------------|
| Valid interaction pairs    | 308,696,243  |
| Valid interaction pairs FF | 76,461,667   |
| Valid interaction pairs RR | 76,939,188   |
| Valid interaction pairs RF | 75,869,522   |
| Valid interaction pairs FR | 79,425,866   |
| Dangling end pairs         | 74,339,487   |
| Religation pairs           | 2,697,140    |
| Self- Cycle pairs          | 3,060,122    |
| Dumped pairs               | 48,361,073   |
