# Supplementary figures and images for: Chromosome-Level Comprehensive Genome of Mangrove Sediment-Derived Fungus Penicillium variabile HXQ-H-1
Source: MDPI journal article supplement (doi:10.3390/jof6010007), 2019-12-23

a

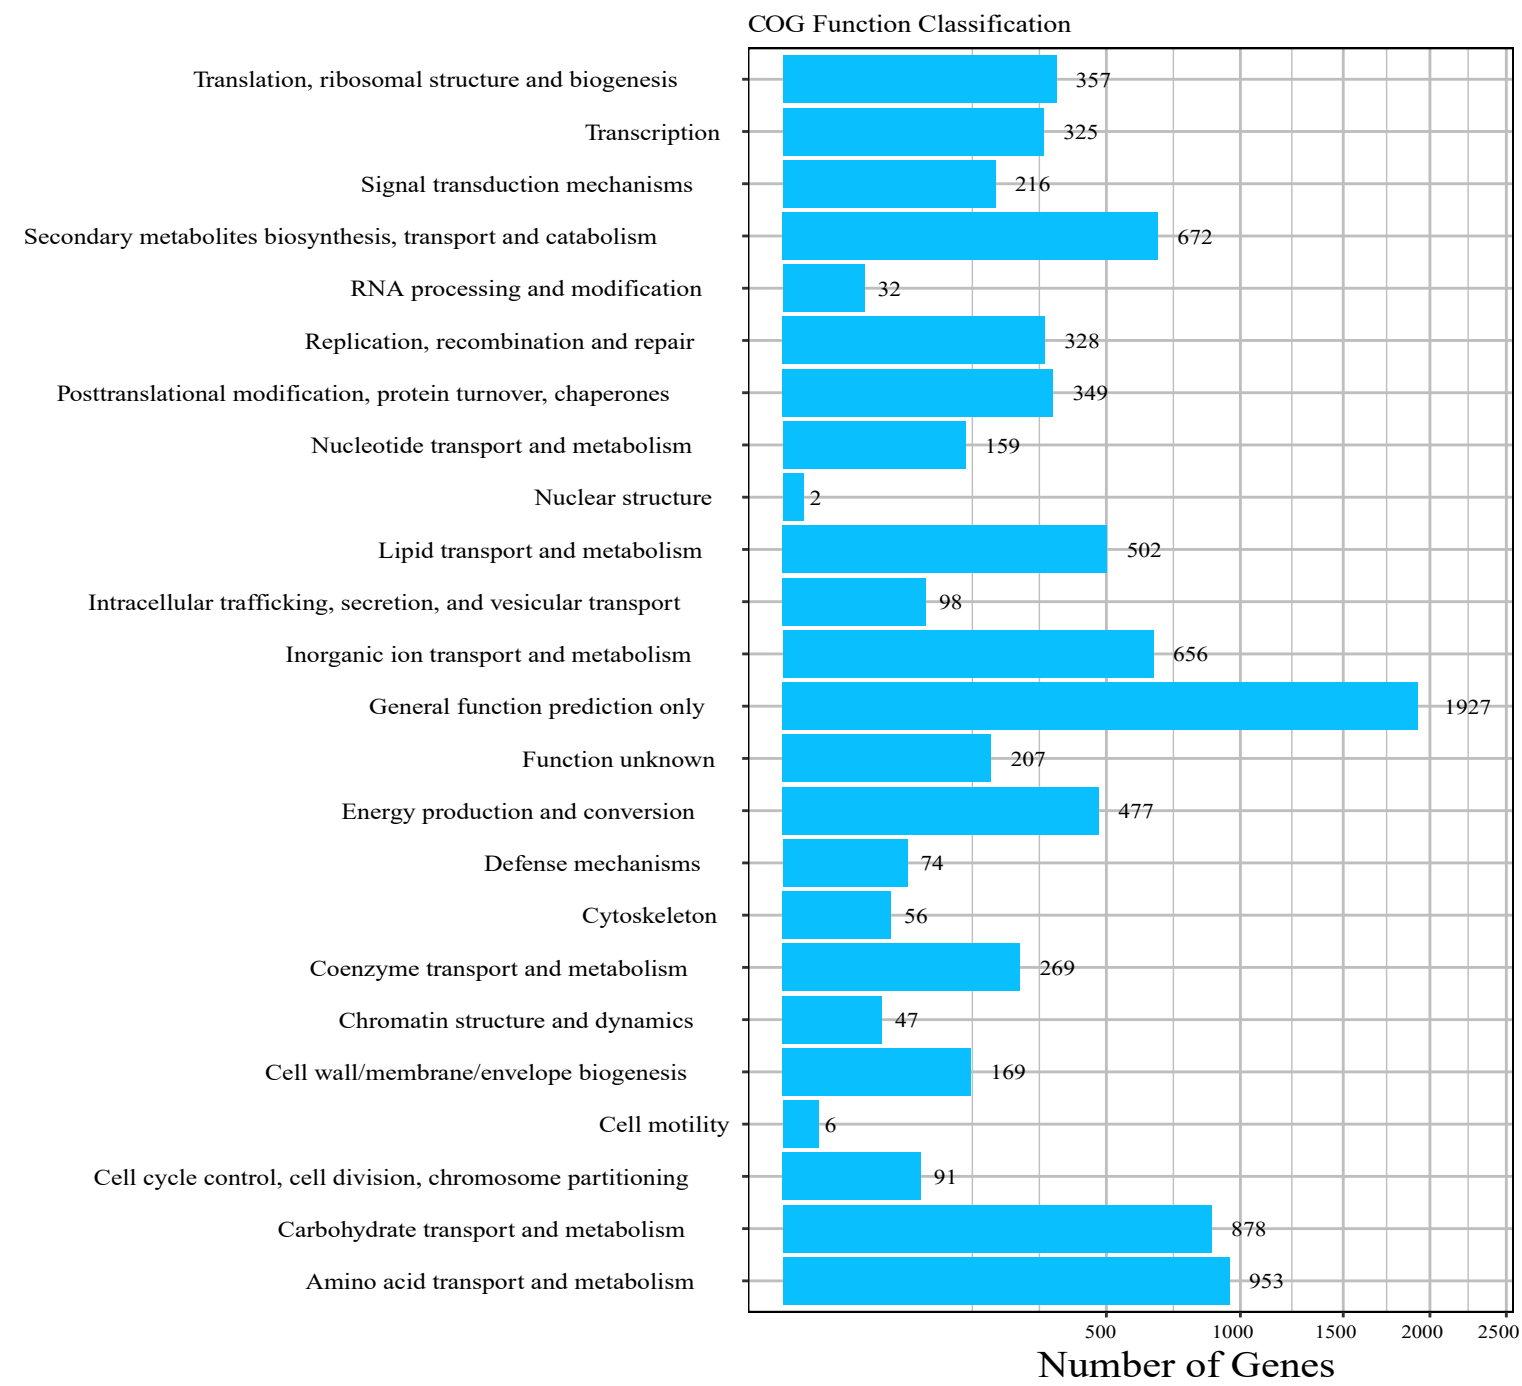

b

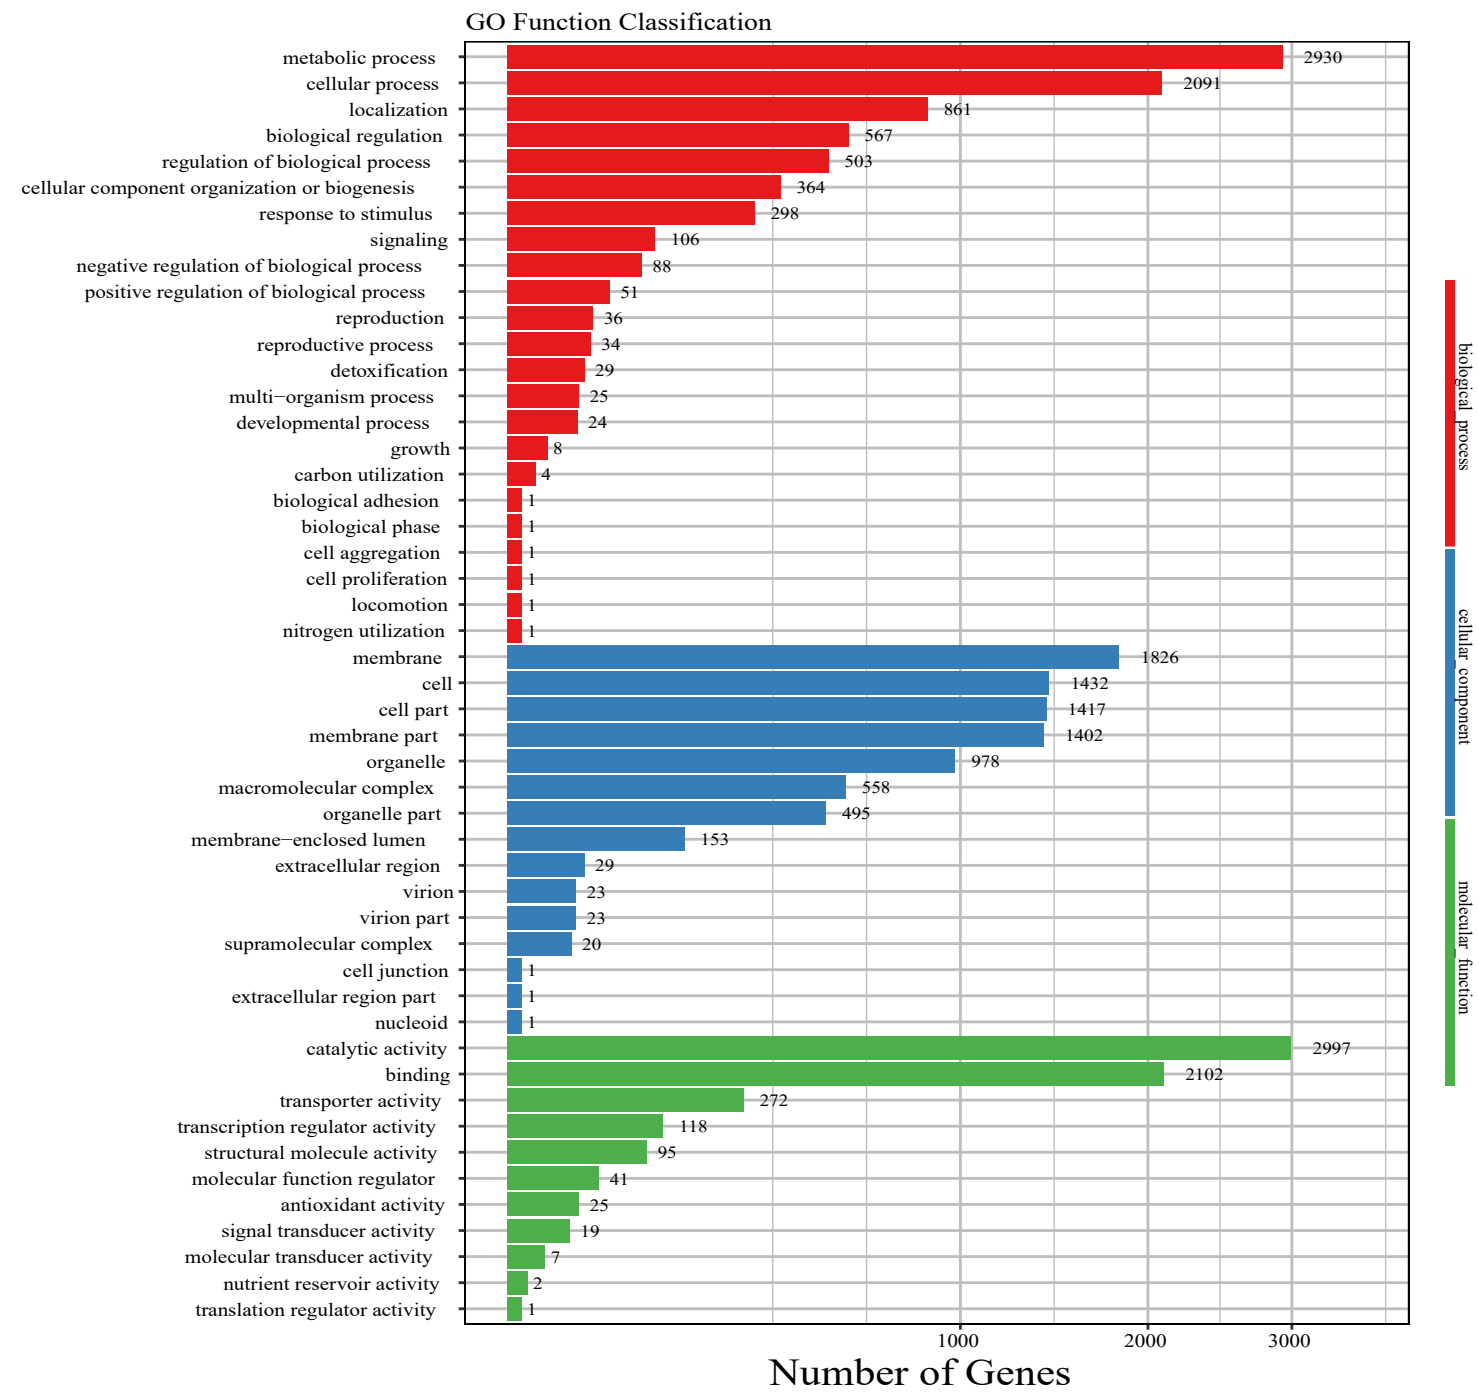

Supplement: s1 [file s1]

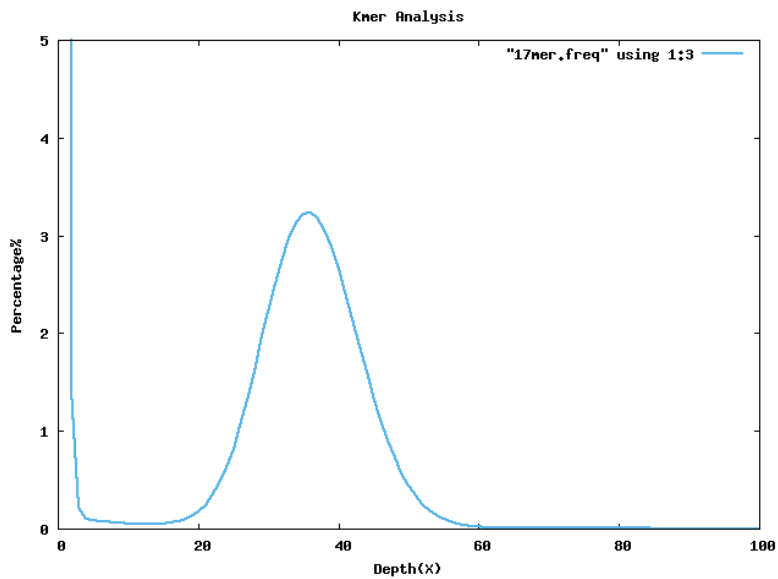

Supplement: s1 [file s1]
